# Supplementary material for: Enhanced T Cell Responses Induced by a Necrotic Dendritic Cell Vaccine, Expressing HCV NS3
Source: PubMed Central journal article supplement (PMC7739890; doi:10.3389/fmicb.2020.559105), 2020-11-24
Supplement: Image_1.pdf [file Image_1.pdf]

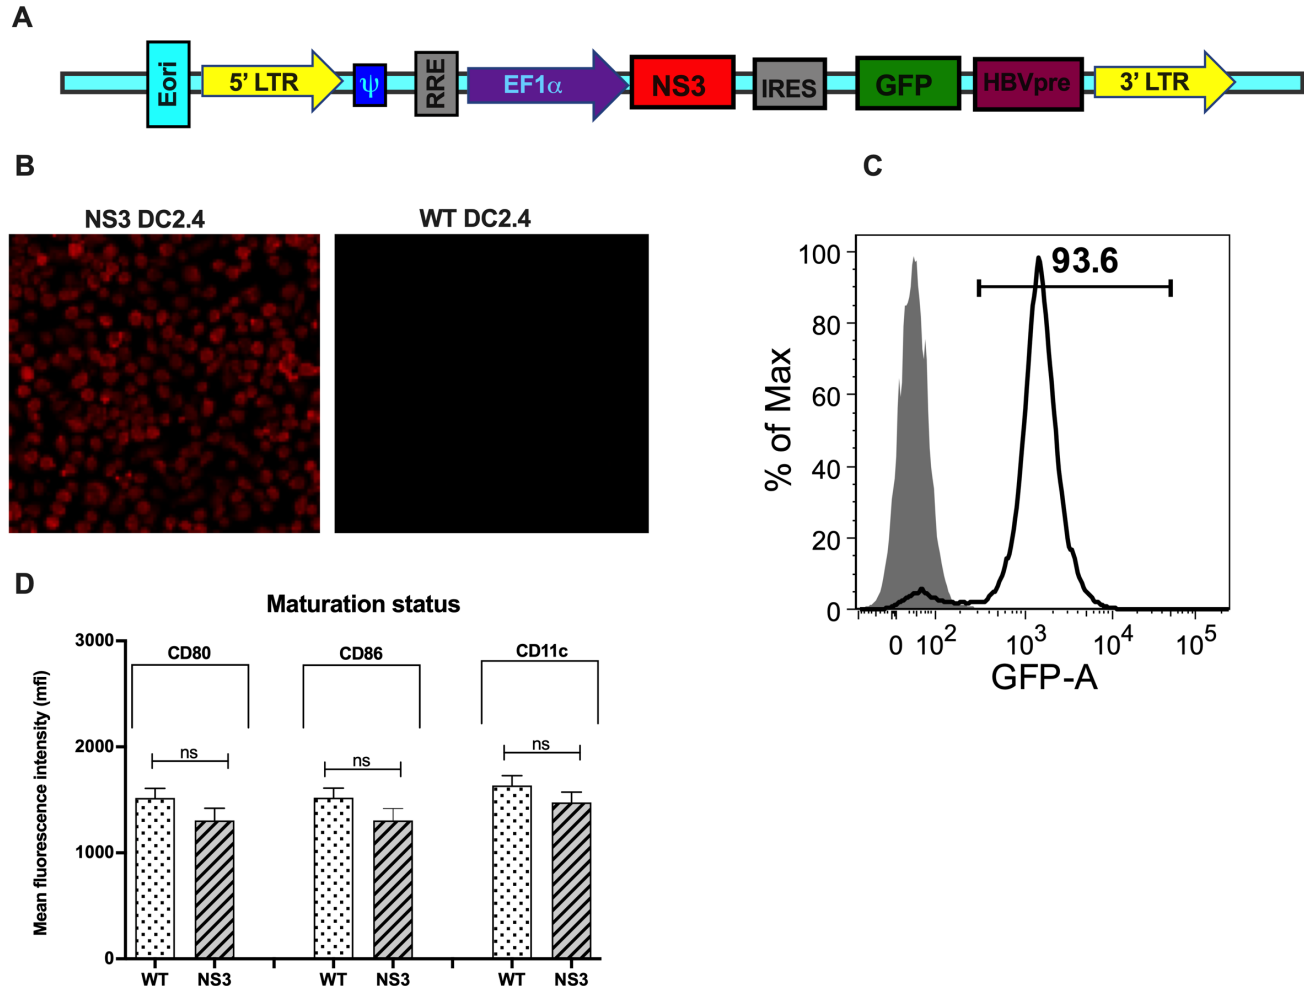

**Supplementary Figure 1. Generation of a stable DC2.4 cell line expressing HCV gt1b NS3 protein.** (A) Third-generation lentiviral vectors overexpressing codon optimized HCV NS3 were created with Gateway technology, where the codon optimised NS3 (gt1b) was inserted under the control of the EF-1 $\alpha$  promoter and the marker gene (GFP) was expressed from IRES. (B) NS3 expression in NS3 DC2.4 stable cells was confirmed by immunofluorescence (C) GFP expression was used to confirm the purity of stable NS3 DC2.4 cell line by flow cytometry (black line), against wild type DC2.4 used as controls (grey). (D) Flow cytometric analysis of WT DC2.4 and NS3 DC2.4 cells stained for CD11c, CD80 and CD86.
