# Supplementary material for: Enhanced T Cell Responses Induced by a Necrotic Dendritic Cell Vaccine, Expressing HCV NS3
Source: PubMed Central journal article supplement (PMC7739890; doi:10.3389/fmicb.2020.559105), 2020-11-24
Supplement: Image_2.pdf [file Image_2.pdf]

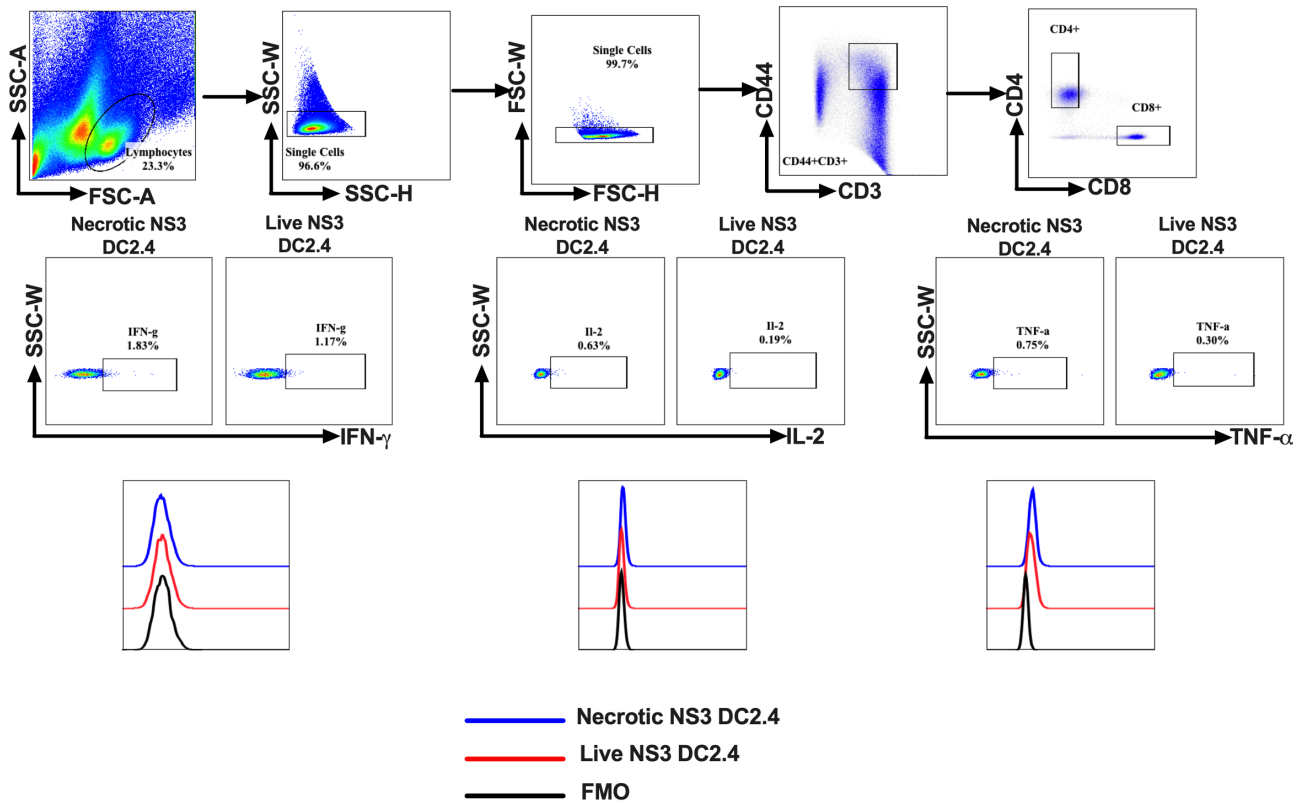

**Supplementary Figure 2: Gating strategy used to detect cytokine producing CD8<sup>+</sup> and CD4<sup>+</sup> T cells in vaccinated mice.** Splenocytes from C57BL/6 mice (n=7/group) vaccinated with 10<sup>6</sup> live or necrotic NS3 DC2.4 cells were harvested 2 weeks post-vaccination, stimulated with the immunodominant NS3 epitopes and the functional characteristics of the effector memory CD3<sup>+</sup> CD44<sup>high</sup> CD8<sup>+</sup> and CD3<sup>+</sup> CD44<sup>high</sup> CD4<sup>+</sup> T cells assessed by ICS. Splenocytes were gated on the lymphocyte population, followed by doublet discrimination, and then gated on CD3<sup>+</sup> CD44<sup>+</sup> cells and finally CD4<sup>+</sup> or CD8<sup>+</sup> cells. Representative plots for IL-2, TNF- $\alpha$  and IFN- $\gamma$  -positive cells are shown.
