# Supplementary material for: Enhanced T Cell Responses Induced by a Necrotic Dendritic Cell Vaccine, Expressing HCV NS3
Source: PubMed Central journal article supplement (PMC7739890; doi:10.3389/fmicb.2020.559105), 2020-11-24
Supplement: Image_4.pdf [file Image_4.pdf]

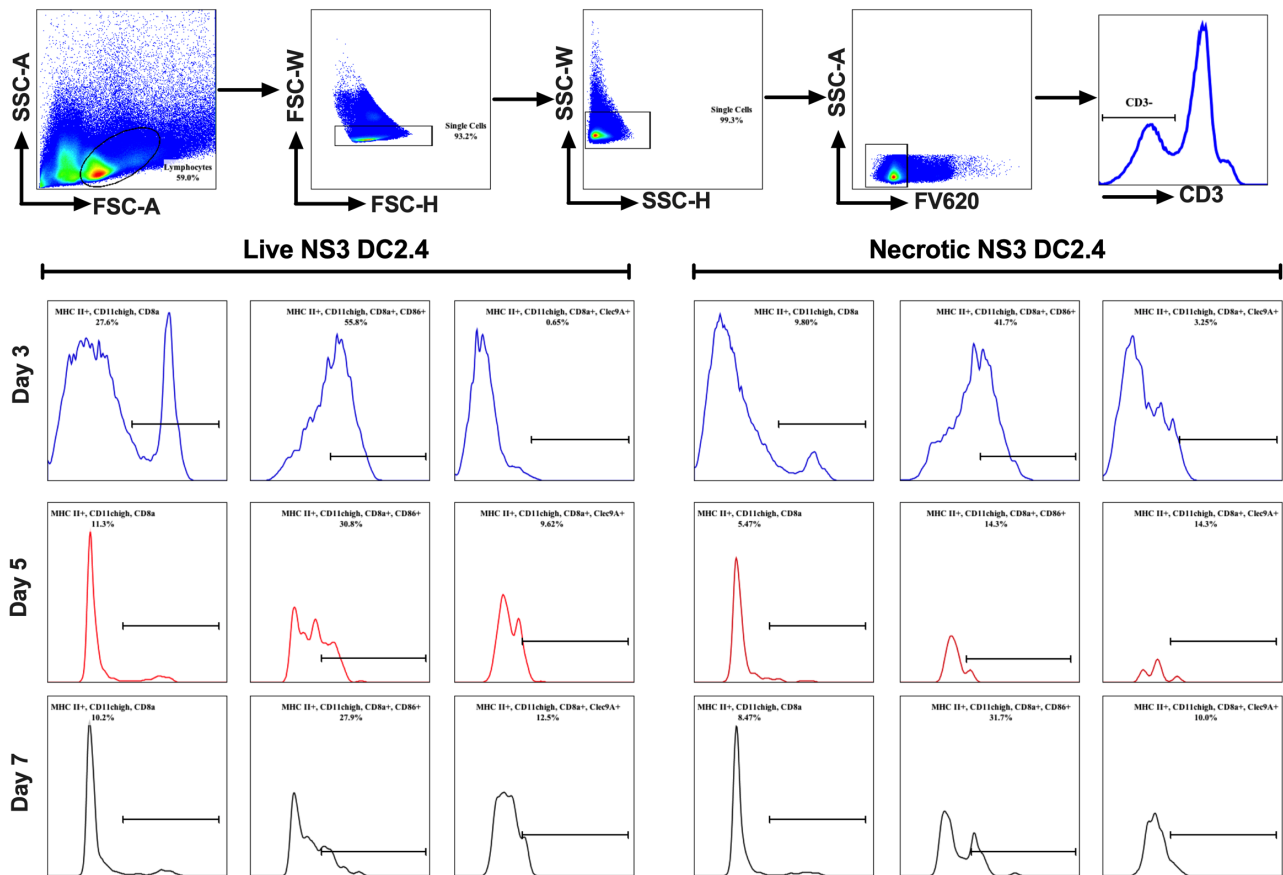

**Supplementary Figure 4:** Gating strategy of DC isolated from DLN post vaccination. Axillary lymph nodes were harvested on days 2, 3, 5 and 7 after a single (s.c.) vaccination with  $10^6$  live or necrotic NS3 DC2.4 cells. DC staining was performed on cell suspensions using CD8a-APC-Cy7, CD11c-PeCy7, CD86-PE, MHCII-FITC and Clec9A-PE antibodies. Purified lymphocytes cells were double discriminated using FSC and SSC followed by discrimination of live cells and then gated on CD3<sup>-</sup> (non-T) cells followed by CD11c<sup>high</sup> MHC-II<sup>+</sup> cells (DC), CD11c<sup>high</sup> MHC-II<sup>+</sup> CD8a<sup>+</sup> cells (cross-presenting CD8a<sup>+</sup> DC) and CD11c<sup>high</sup> MHCII<sup>+</sup> CD8a<sup>+</sup> Clec9A<sup>+</sup> (necrosis-sensing Clec9A<sup>+</sup> DC) or CD11c<sup>high</sup> MHCII<sup>+</sup> CD8a<sup>+</sup> CD86<sup>+</sup> (activated cross presenting CD8a<sup>+</sup> DC). Gating strategy and representative plots from day 3, 5 and 7 are shown.
